# Supplementary material
Source: PubMed Central journal article supplement (PMC5671378)

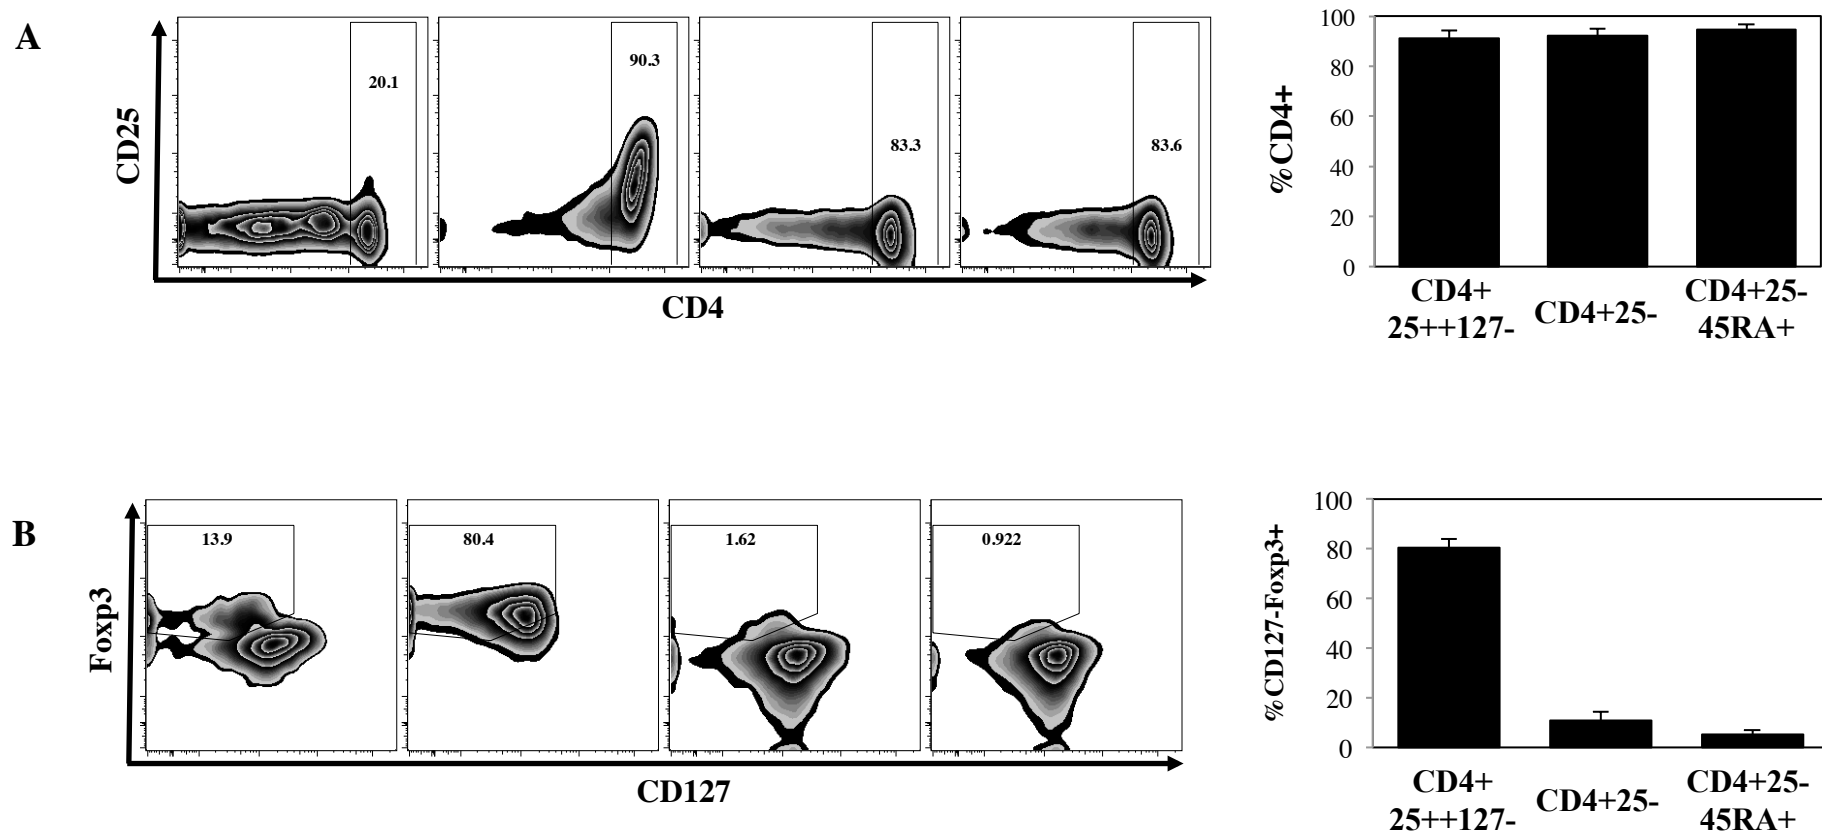

**Figure S1: Purification phenotype of cells used in this study.**

**Figure S2: Schema for in vitro expansion of tTreg, Rapa/TGFβ iTreg, naïve CD4 Teff and naïve CD4+ LT/Kyn iTreg.**

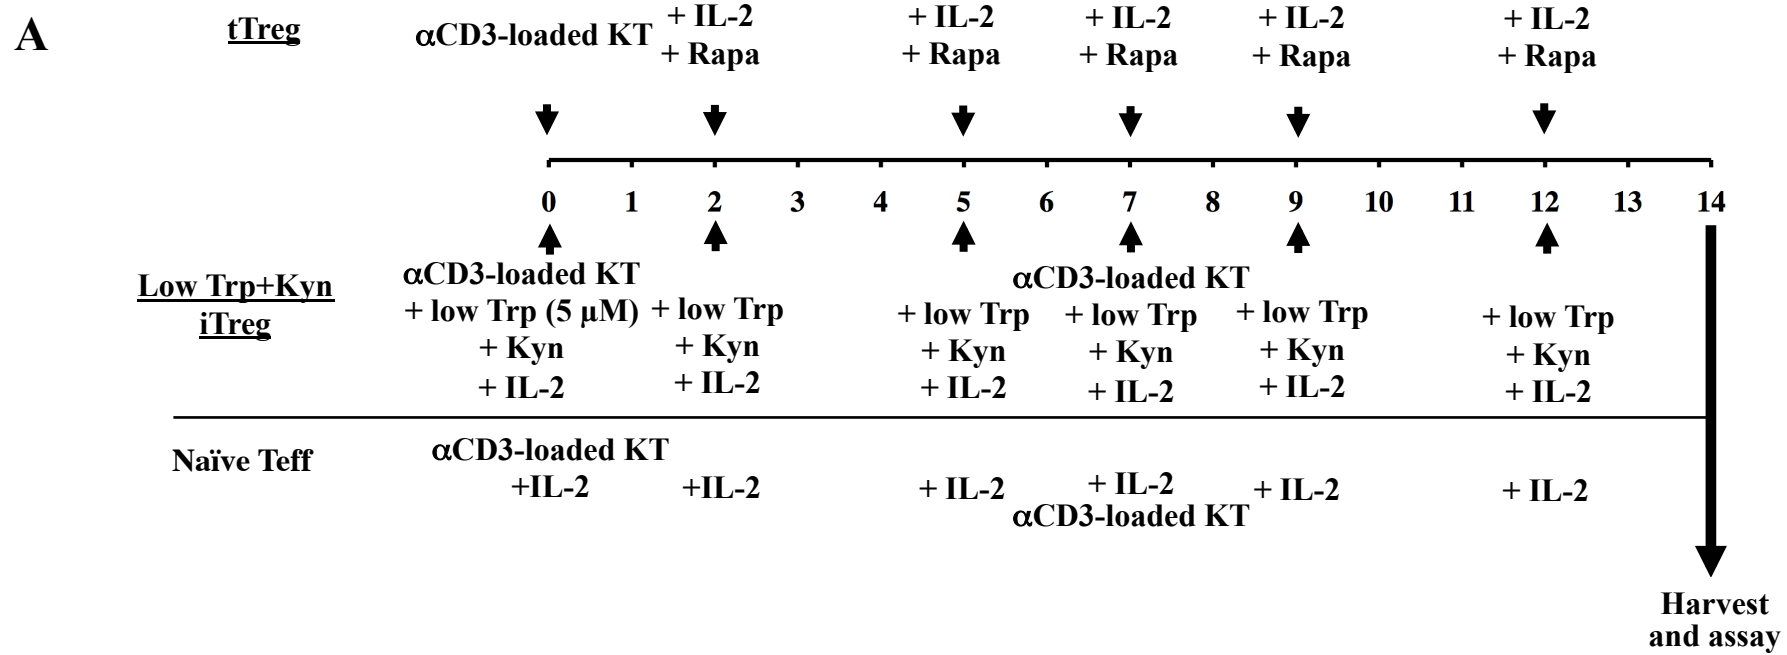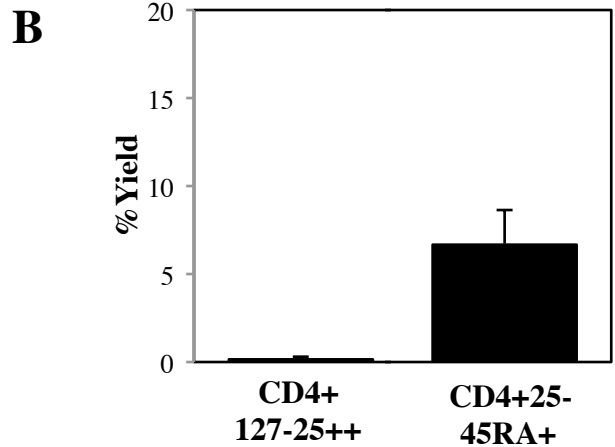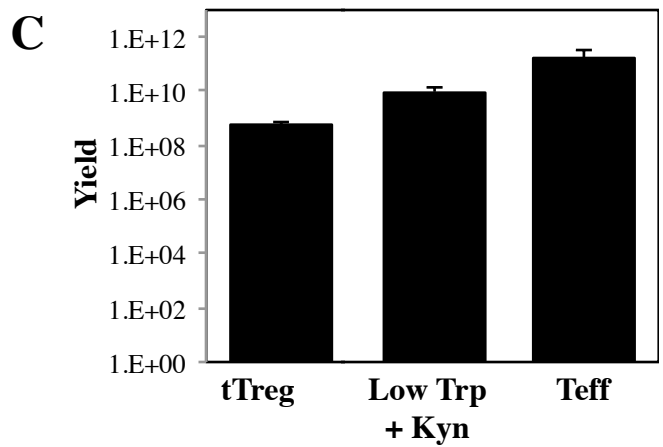

**Figure S3: Low Trp+Kyn iTreg, like tTreg, secrete IL-10 and not effector cytokines but do not have Foxp3 gene hypomethylation or Helios expression**

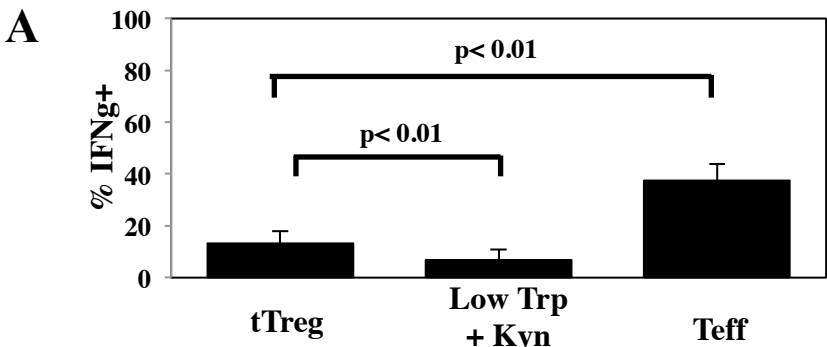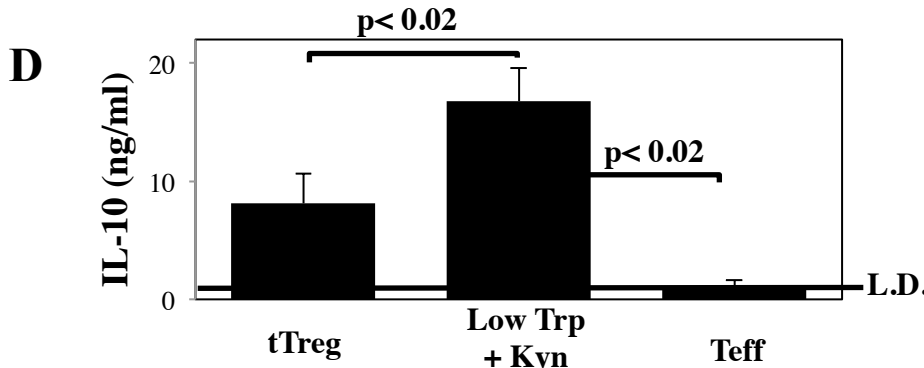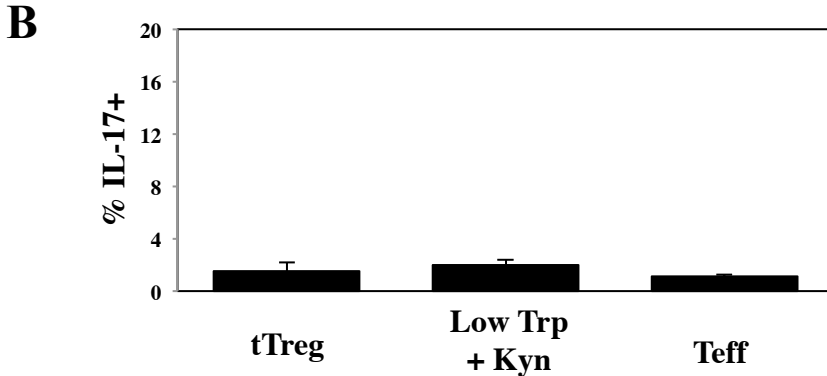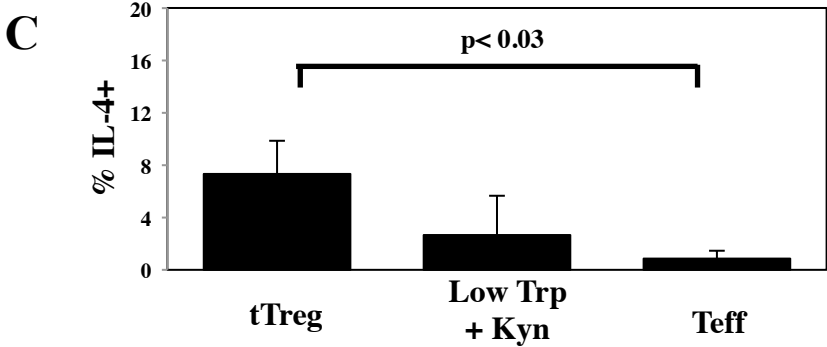

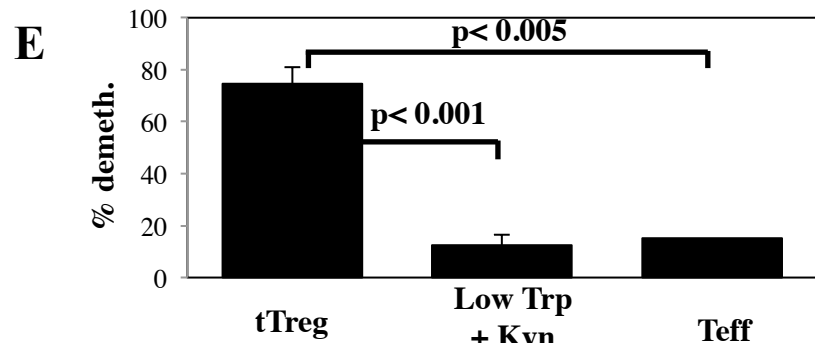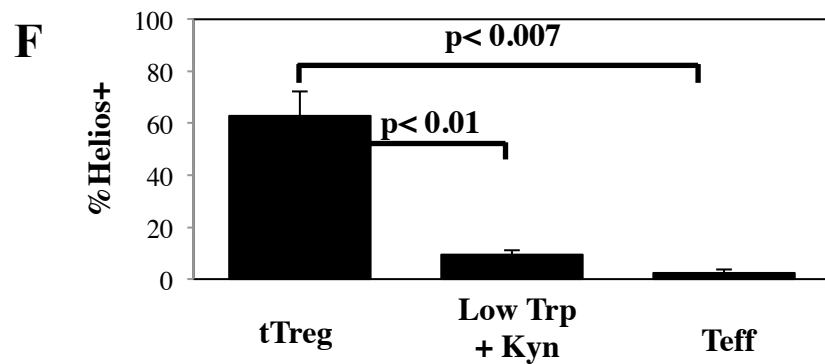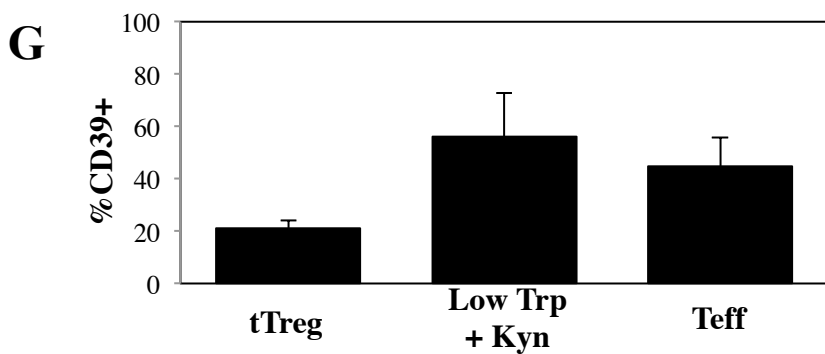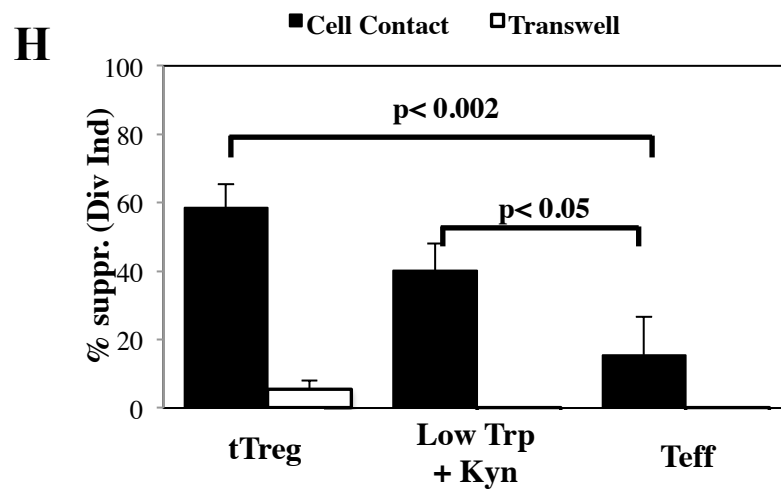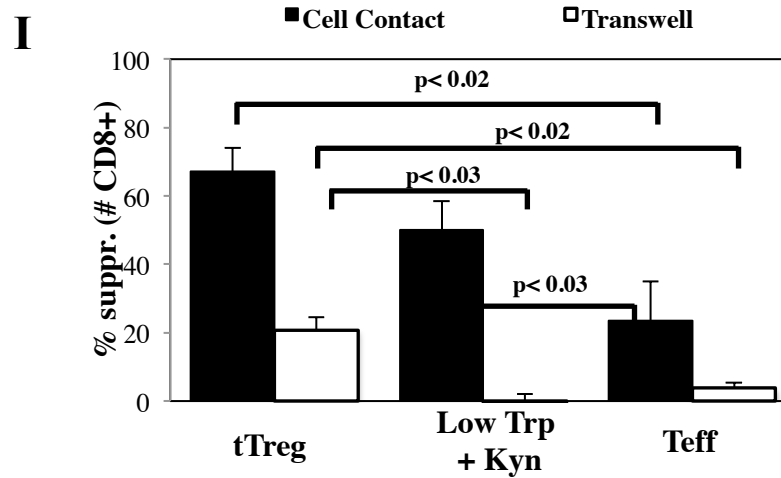

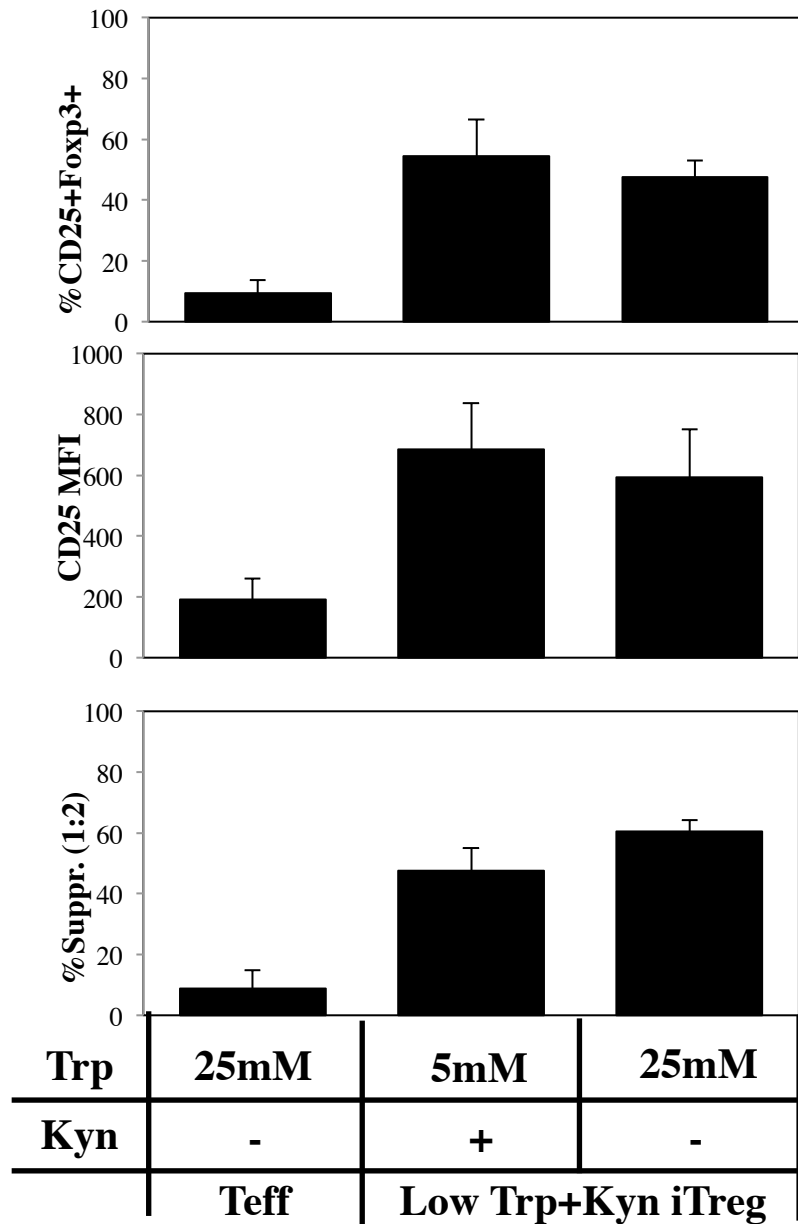

**Figure S4: Low Trp + Kyn iTreg phenotype and suppressive function are stable in vitro.**

**Figure S5: tTreg express significantly higher levels of genes involved in FAO compared to Low Trp+Kyn iTreg and Teff.**

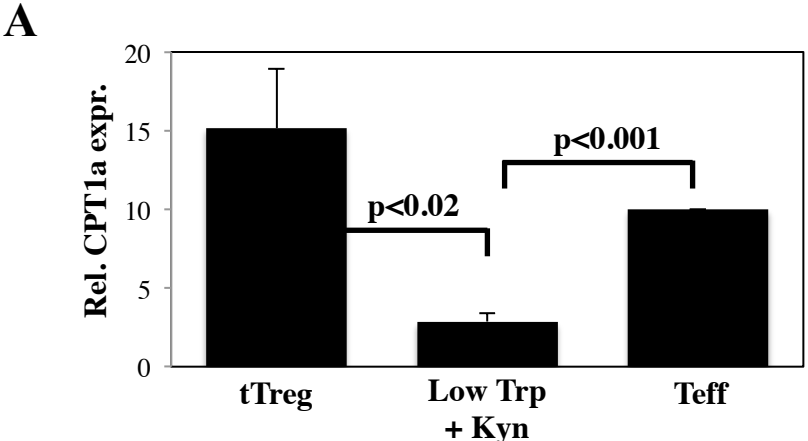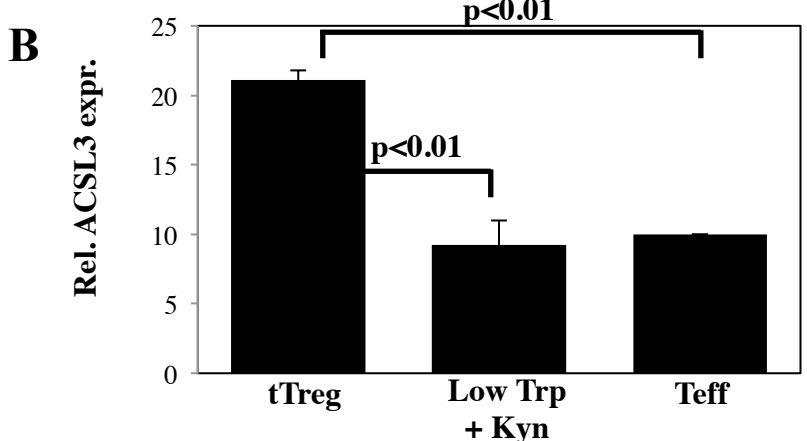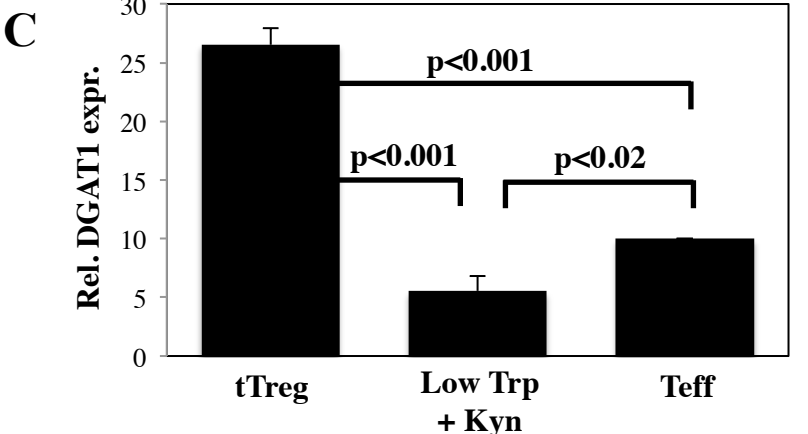

**Figure S6: Adoptive transfer of Low Trp + Kyn iTreg does not increase survival in a xenogeneic model of GVHD.**

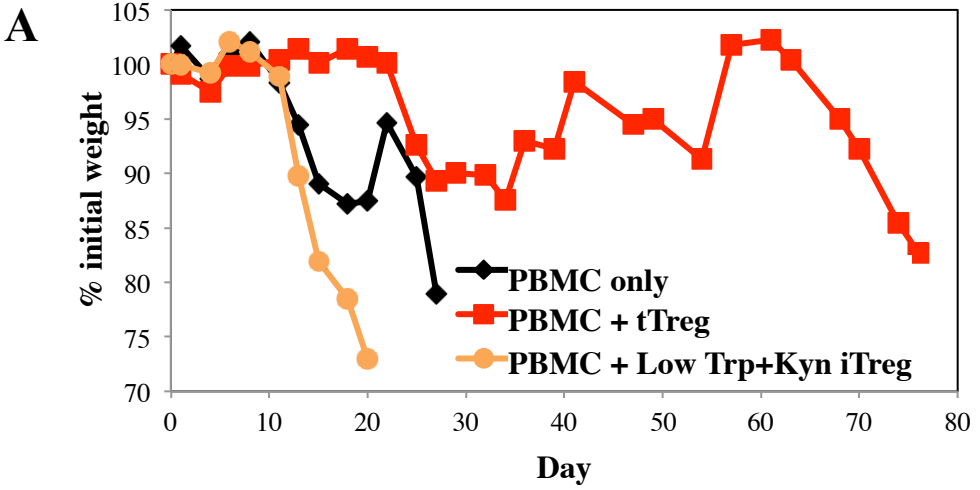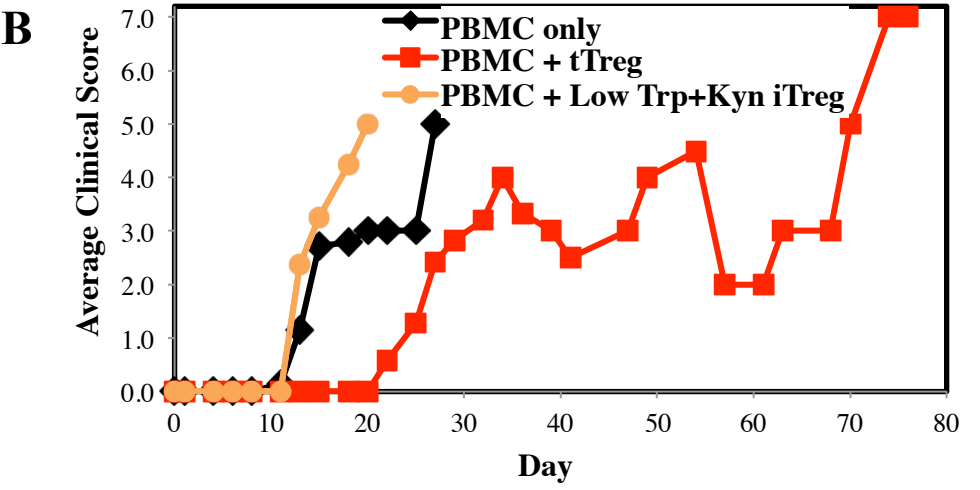

**Figure S7: Low Trp+Kyn iTregs are highly IL-2-dependent for survival.**

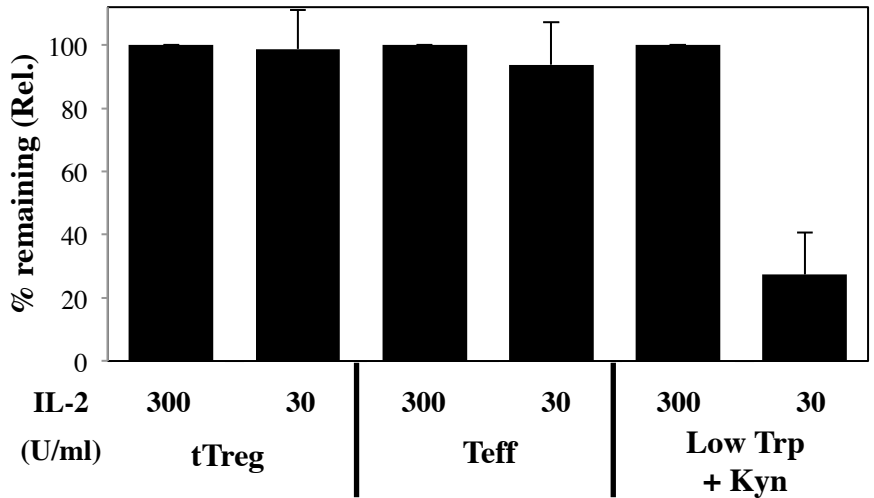



**Figure S8: Ultra-low dose IL-2 improves xenoGVHD survival in mice treated with Low Trp+Kyn iTregs, but does not increase overall recipient survival.**

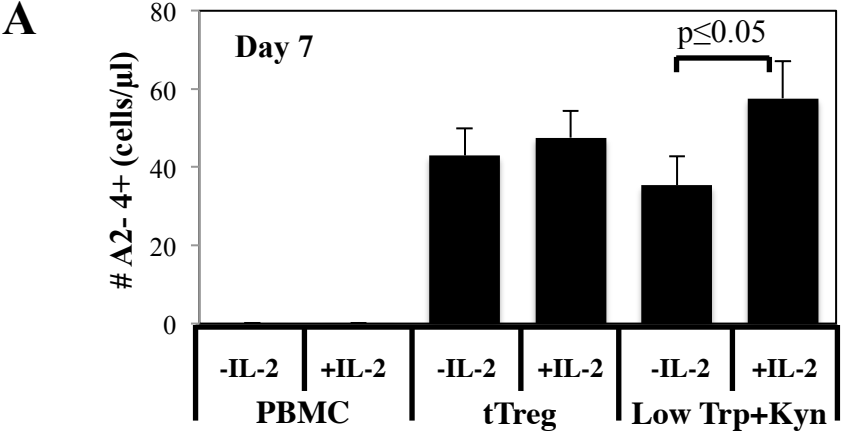

**Figure S8: Ultra-low dose IL-2 improves xenoGVHD survival in mice treated with Low Trp+Kyn iTregs, but does not increase overall recipient survival.**

**B**

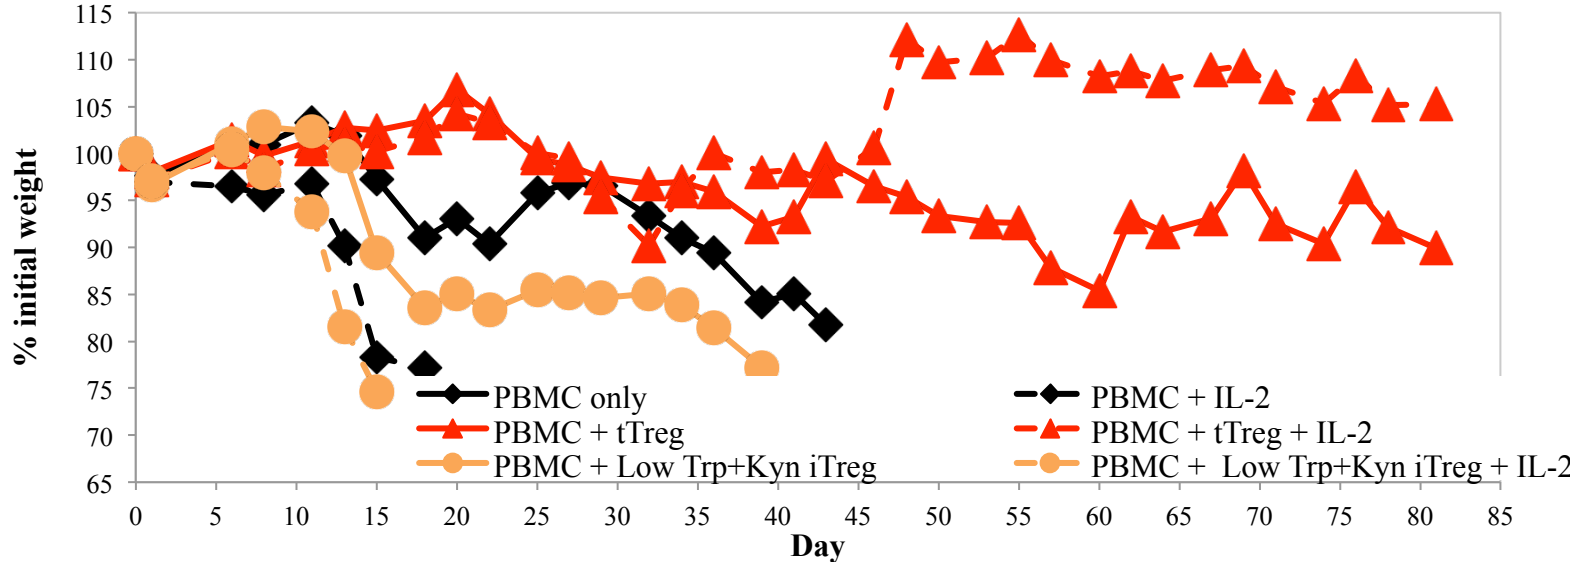

**C**

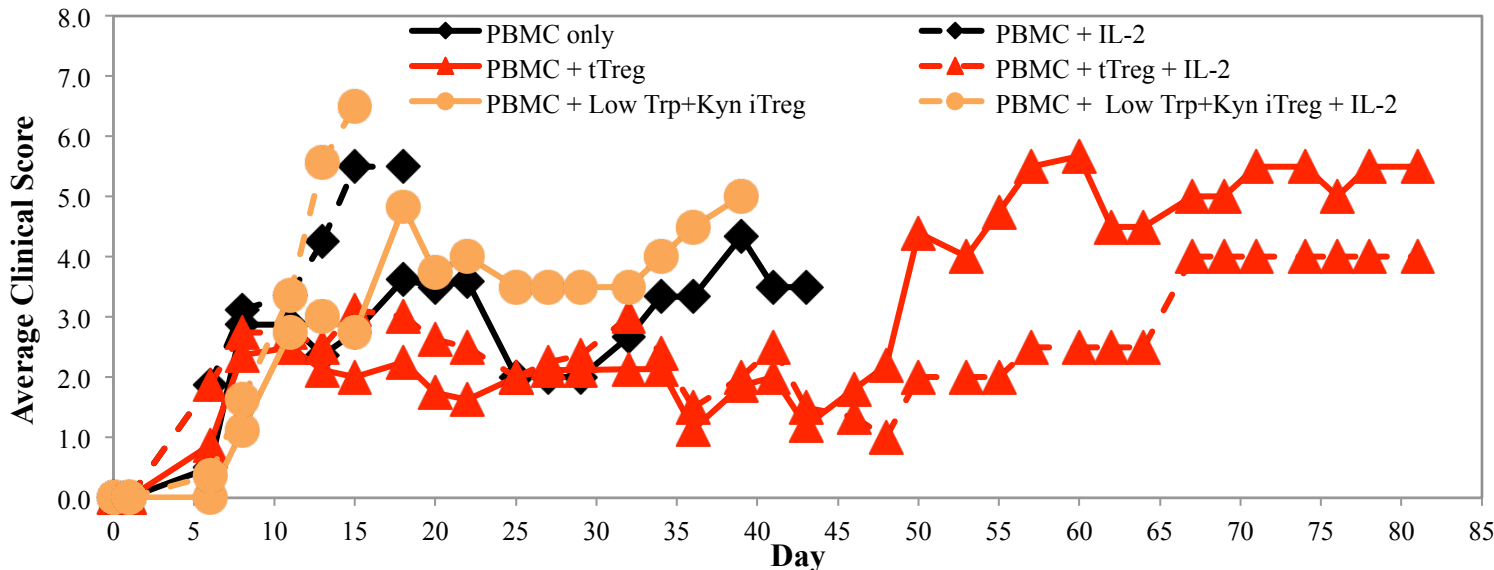

Supplement: NIHMS872827-supplement-Supp_Fig_S1.pdf [file NIHMS872827-supplement-Supp_Fig_S1.pdf]
